# Supplementary material for: When Three Isn’t a Crowd: A Digyny Concept for Treatment-Resistant, Near-Triploid Human Cancers
Source: MDPI journal article supplement (doi:10.3390/genes10070551), 2019-07-19
Supplement: s1 [file s1]

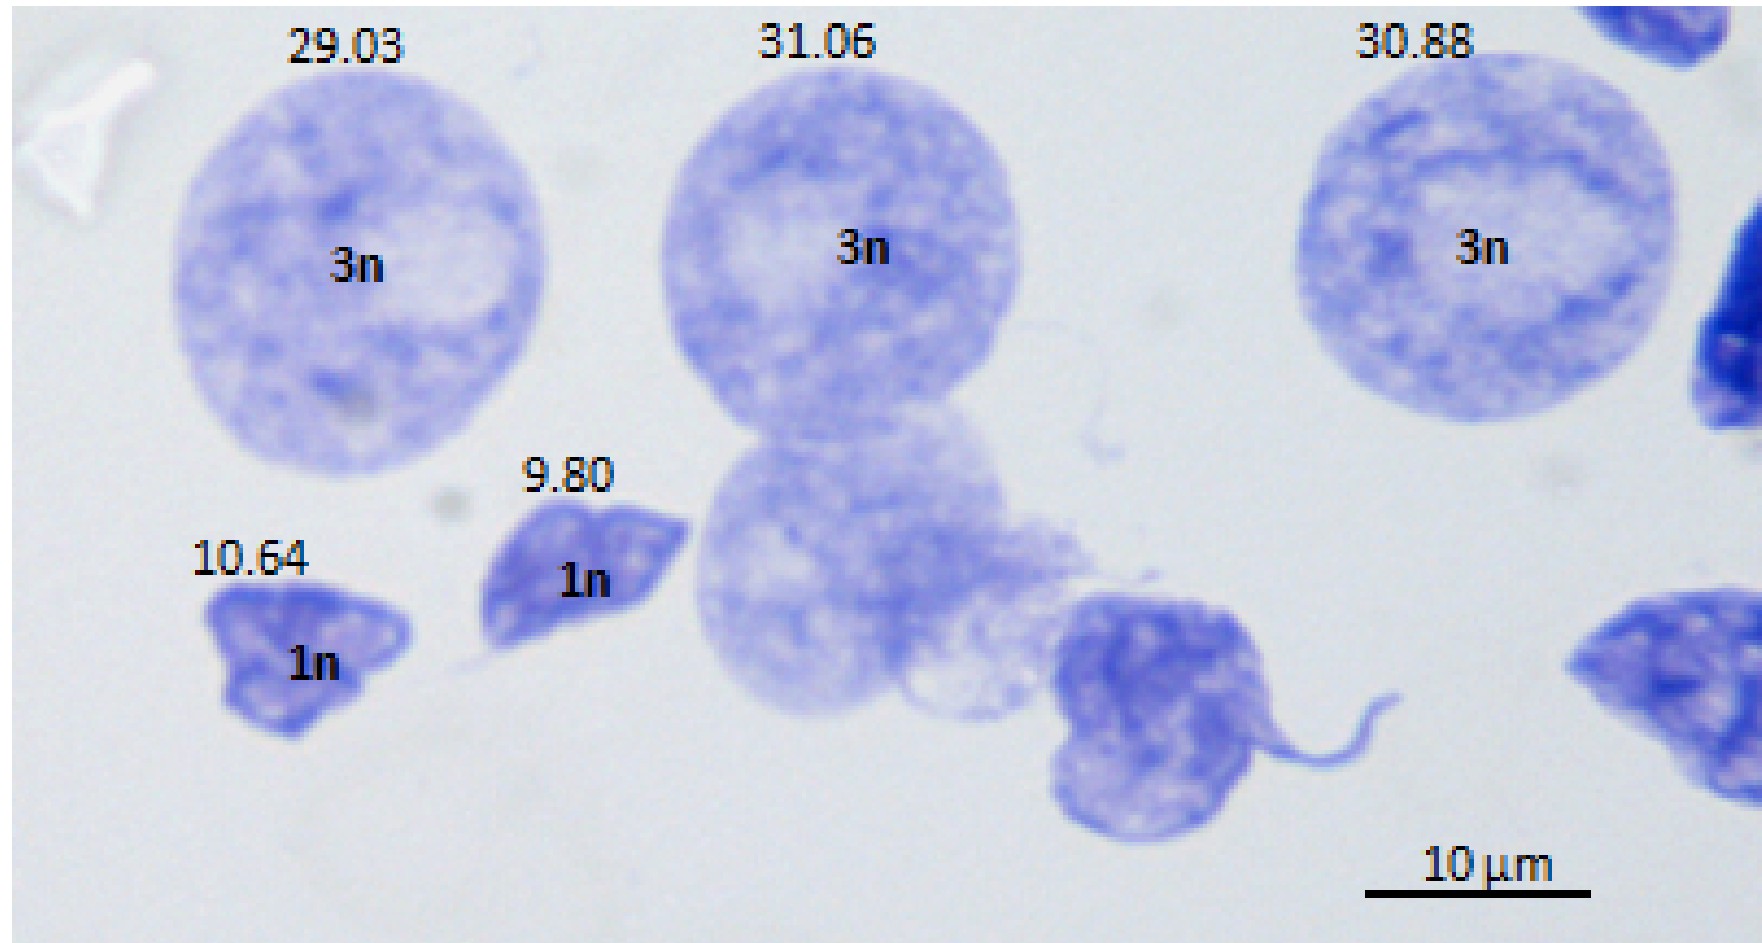

Supplementary Fig.S2. Microphotograph of TB-DNA-stained diagnostic biopsy cell nuclei of the triple negative case 17. Among triploid nuclei (3n), a pair of haploid nuclei (1n) is seen, whose morphology and a faint bridge indicate that they have derived by division of a common mother. The numeric values shown next to the nuclei represent IODs of these nuclei. Average IOD for lymphocytes (2c) =  $19.93 \pm 1.39$  SD (n = 5).
